# Supplementary material for: Acceptance Towards LGB Persons Is an Independent Protective Factor Against Suicide on a Country Level
Source: Springer Nature journal article supplement (doi:10.1007/s13178-020-00477-3), 2020-07-16
Supplement: MOESM1 [file 18191302]

**Supplementary Table 1:**

Root mean squared error (RMSE) in the cross validation and Bayesian information criterion of all possible models (combinations of predictors). The first eight rows indicate if a predictor was (1) or was not (0) part of the respective model. The last two rows show RMSE and BIC of the model. It can be seen that the model with fertility rate, unemployment rate, LGB inclusiveness and religiosity performs best in both measures (printed bold). This is also confirmed by classical backward elimination of predictors (see main text).

| Fertility Rate | Female labor participation | Unemployment | LGB acceptance | Religiosity | GDP per capita | Gini coefficient | Health expenditure | RMSE in test set | BIC            |
|----------------|----------------------------|--------------|----------------|-------------|----------------|------------------|--------------------|------------------|----------------|
| 0              | 0                          | 0            | 0              | 0           | 0              | 0                | 0                  | 3,6243792414     | 185,5466253202 |
| 1              | 0                          | 0            | 0              | 0           | 0              | 0                | 0                  | 3,5921051972     | 185,8163818397 |
| 0              | 1                          | 0            | 0              | 0           | 0              | 0                | 0                  | 3,5862043414     | 186,8228189386 |
| 1              | 1                          | 0            | 0              | 0           | 0              | 0                | 0                  | 3,5159369904     | 186,0015698604 |
| 0              | 0                          | 1            | 0              | 0           | 0              | 0                | 0                  | 3,3733294938     | 182,6502726262 |
| 1              | 0                          | 1            | 0              | 0           | 0              | 0                | 0                  | 3,0823672484     | 178,028551471  |
| 0              | 1                          | 1            | 0              | 0           | 0              | 0                | 0                  | 3,4713526202     | 185,8195086374 |
| 1              | 1                          | 1            | 0              | 0           | 0              | 0                | 0                  | 3,1702666227     | 181,0082443443 |
| 0              | 0                          | 0            | 1              | 0           | 0              | 0                | 0                  | 3,7555148525     | 188,3517493308 |
| 1              | 0                          | 0            | 1              | 0           | 0              | 0                | 0                  | 3,7317794758     | 188,8271662339 |
| 0              | 1                          | 0            | 1              | 0           | 0              | 0                | 0                  | 3,4681825701     | 184,9191821642 |
| 1              | 1                          | 0            | 1              | 0           | 0              | 0                | 0                  | 3,4609162897     | 183,6121579097 |
| 0              | 0                          | 1            | 1              | 0           | 0              | 0                | 0                  | 3,4361606342     | 184,401952736  |
| 1              | 0                          | 1            | 1              | 0           | 0              | 0                | 0                  | 3,1355786542     | 179,8255740695 |
| 0              | 1                          | 1            | 1              | 0           | 0              | 0                | 0                  | 3,4218490613     | 184,5971436774 |
| 1              | 1                          | 1            | 1              | 0           | 0              | 0                | 0                  | 3,1618666825     | 179,3303365353 |
| 0              | 0                          | 0            | 0              | 1           | 0              | 0                | 0                  | 3,4305765574     | 183,5306925663 |
| 1              | 0                          | 0            | 0              | 1           | 0              | 0                | 0                  | 3,3520502858     | 183,1544776275 |
| 0              | 1                          | 0            | 0              | 1           | 0              | 0                | 0                  | 3,5021353483     | 187,0347151639 |
| 1              | 1                          | 0            | 0              | 1           | 0              | 0                | 0                  | 3,4177228754     | 186,4630642163 |
| 0              | 0                          | 1            | 0              | 1           | 0              | 0                | 0                  | 3,3407354107     | 183,3633050678 |
| 1              | 0                          | 1            | 0              | 1           | 0              | 0                | 0                  | 3,061991722      | 178,9995227069 |
| 0              | 1                          | 1            | 0              | 1           | 0              | 0                | 0                  | 3,4242435697     | 186,7631365912 |
| 1              | 1                          | 1            | 0              | 1           | 0              | 0                | 0                  | 3,1466334575     | 182,5058527366 |
| 0              | 0                          | 0            | 1              | 1           | 0              | 0                | 0                  | 3,2438110389     | 179,9082458629 |
| 1              | 0                          | 0            | 1              | 1           | 0              | 0                | 0                  | 3,1802582067     | 179,8693912103 |
| 0              | 1                          | 0            | 1              | 1           | 0              | 0                | 0                  | 3,2346257702     | 181,0788989708 |
| 1              | 1                          | 0            | 1              | 1           | 0              | 0                | 0                  | 3,1843697307     | 179,8963798396 |
| 0              | 0                          | 1            | 1              | 1           | 0              | 0                | 0                  | 3,1514638312     | 179,4970370439 |

| Fertility Rate | Female labor participation | Unemployment | LGB acceptance | Religiosity | GDP per capita | Gini coefficient | Health expenditure | RMSE in test set    | BIC                   |
|----------------|----------------------------|--------------|----------------|-------------|----------------|------------------|--------------------|---------------------|-----------------------|
| 1              | 0                          | 1            | 1              | 1           | 0              | 0                | 0                  | <b>2,8912009573</b> | <b>175,3934982538</b> |
| 0              | 1                          | 1            | 1              | 1           | 0              | 0                | 0                  | 3,2218737583        | 181,9633399525        |
| 1              | 1                          | 1            | 1              | 1           | 0              | 0                | 0                  | 2,9824783051        | 177,3488560735        |
| 0              | 0                          | 0            | 0              | 0           | 1              | 0                | 0                  | 3,691529316         | 188,8413562022        |
| 1              | 0                          | 0            | 0              | 0           | 1              | 0                | 0                  | 3,6771932206        | 189,1811166924        |
| 0              | 1                          | 0            | 0              | 0           | 1              | 0                | 0                  | 3,6345805754        | 190,3300491069        |
| 1              | 1                          | 0            | 0              | 0           | 1              | 0                | 0                  | 3,5670044309        | 189,3678026957        |
| 0              | 0                          | 1            | 0              | 0           | 1              | 0                | 0                  | 3,4567248629        | 186,1711813366        |
| 1              | 0                          | 1            | 0              | 0           | 1              | 0                | 0                  | 3,1536000018        | 181,3531823795        |
| 0              | 1                          | 1            | 0              | 0           | 1              | 0                | 0                  | 3,5357496237        | 189,2511284077        |
| 1              | 1                          | 1            | 0              | 0           | 1              | 0                | 0                  | 3,2190862111        | 183,9329847208        |
| 0              | 0                          | 0            | 1              | 0           | 1              | 0                | 0                  | 3,8558948347        | 190,4682301498        |
| 1              | 0                          | 0            | 1              | 0           | 1              | 0                | 0                  | 3,8652058639        | 191,3373661813        |
| 0              | 1                          | 0            | 1              | 0           | 1              | 0                | 0                  | 3,4915215072        | 187,388816014         |
| 1              | 1                          | 0            | 1              | 0           | 1              | 0                | 0                  | 3,5040661821        | 186,5269245989        |
| 0              | 0                          | 1            | 1              | 0           | 1              | 0                | 0                  | 3,549417747         | 187,2707032854        |
| 1              | 0                          | 1            | 1              | 0           | 1              | 0                | 0                  | 3,2575066834        | 183,2241340072        |
| 0              | 1                          | 1            | 1              | 0           | 1              | 0                | 0                  | 3,4729638386        | 187,5033929633        |
| 1              | 1                          | 1            | 1              | 0           | 1              | 0                | 0                  | 3,2226596164        | 182,7575430844        |
| 0              | 0                          | 0            | 0              | 1           | 1              | 0                | 0                  | 3,4816005174        | 186,9719893866        |
| 1              | 0                          | 0            | 0              | 1           | 1              | 0                | 0                  | 3,4129378387        | 186,4939285636        |
| 0              | 1                          | 0            | 0              | 1           | 1              | 0                | 0                  | 3,5491665683        | 190,4399558422        |
| 1              | 1                          | 0            | 0              | 1           | 1              | 0                | 0                  | 3,4685668962        | 189,6310233559        |
| 0              | 0                          | 1            | 0              | 1           | 1              | 0                | 0                  | 3,3975005731        | 186,5781080128        |
| 1              | 0                          | 1            | 0              | 1           | 1              | 0                | 0                  | 3,1033589146        | 181,667342921         |
| 0              | 1                          | 1            | 0              | 1           | 1              | 0                | 0                  | 3,4850676167        | 190,0565529155        |
| 1              | 1                          | 1            | 0              | 1           | 1              | 0                | 0                  | 3,1977912063        | 185,1807218945        |
| 0              | 0                          | 0            | 1              | 1           | 1              | 0                | 0                  | 3,3068356242        | 181,9086433604        |
| 1              | 0                          | 0            | 1              | 1           | 1              | 0                | 0                  | 3,2840963729        | 182,2903771658        |
| 0              | 1                          | 0            | 1              | 1           | 1              | 0                | 0                  | 3,2624476142        | 183,313156592         |
| 1              | 1                          | 0            | 1              | 1           | 1              | 0                | 0                  | 3,237974872         | 182,6118924015        |
| 0              | 0                          | 1            | 1              | 1           | 1              | 0                | 0                  | 3,2235439048        | 182,0991882458        |
| 1              | 0                          | 1            | 1              | 1           | 1              | 0                | 0                  | 2,993183345         | 178,6417175316        |
| 0              | 1                          | 1            | 1              | 1           | 1              | 0                | 0                  | 3,2648367377        | 184,6178151248        |

| Fertility Rate | Female labor participation | Unemployment | LGB acceptance | Religiosity | GDP per capita | Gini coefficient | Health expenditure | RMSE in test set | BIC            |
|----------------|----------------------------|--------------|----------------|-------------|----------------|------------------|--------------------|------------------|----------------|
| 1              | 1                          | 1            | 1              | 1           | 1              | 0                | 0                  | 3,0486596456     | 180,6460935441 |
| 0              | 0                          | 0            | 0              | 0           | 0              | 1                | 0                  | 3,4728368666     | 184,4581883976 |
| 1              | 0                          | 0            | 0              | 0           | 0              | 1                | 0                  | 3,5299580288     | 186,6213899479 |
| 0              | 1                          | 0            | 0              | 0           | 0              | 1                | 0                  | 3,5014352998     | 186,9822234305 |
| 1              | 1                          | 0            | 0              | 0           | 0              | 1                | 0                  | 3,523026139      | 188,2718785981 |
| 0              | 0                          | 1            | 0              | 0           | 0              | 1                | 0                  | 3,29228606       | 182,1646075271 |
| 1              | 0                          | 1            | 0              | 0           | 0              | 1                | 0                  | 3,1137548327     | 180,4823603829 |
| 0              | 1                          | 1            | 0              | 0           | 0              | 1                | 0                  | 3,3839382891     | 185,6769199157 |
| 1              | 1                          | 1            | 0              | 0           | 0              | 1                | 0                  | 3,2058723453     | 183,7872750134 |
| 0              | 0                          | 0            | 1              | 0           | 0              | 1                | 0                  | 3,4724531318     | 184,1114636689 |
| 1              | 0                          | 0            | 1              | 0           | 0              | 1                | 0                  | 3,5857669066     | 187,1499028612 |
| 0              | 1                          | 0            | 1              | 0           | 0              | 1                | 0                  | 3,1915997182     | 179,9543280504 |
| 1              | 1                          | 0            | 1              | 0           | 0              | 1                | 0                  | 3,3658773469     | 182,1434492297 |
| 0              | 0                          | 1            | 1              | 0           | 0              | 1                | 0                  | 3,2144281371     | 179,7201106898 |
| 1              | 0                          | 1            | 1              | 0           | 0              | 1                | 0                  | 3,0921046243     | 179,8302572638 |
| 0              | 1                          | 1            | 1              | 0           | 0              | 1                | 0                  | 3,1498279516     | 179,3988802227 |
| 1              | 1                          | 1            | 1              | 0           | 0              | 1                | 0                  | 3,110838424      | 179,1109582707 |
| 0              | 0                          | 0            | 0              | 1           | 0              | 1                | 0                  | 3,4830012143     | 186,1767724649 |
| 1              | 0                          | 0            | 0              | 1           | 0              | 1                | 0                  | 3,425485868      | 186,679028624  |
| 0              | 1                          | 0            | 0              | 1           | 0              | 1                | 0                  | 3,5452640276     | 189,615394705  |
| 1              | 1                          | 0            | 0              | 1           | 0              | 1                | 0                  | 3,4896771392     | 189,9820468246 |
| 0              | 0                          | 1            | 0              | 1           | 0              | 1                | 0                  | 3,3564780557     | 185,3376169893 |
| 1              | 0                          | 1            | 0              | 1           | 0              | 1                | 0                  | 3,1231759737     | 182,5248257349 |
| 0              | 1                          | 1            | 0              | 1           | 0              | 1                | 0                  | 3,4371997205     | 188,8202509257 |
| 1              | 1                          | 1            | 0              | 1           | 0              | 1                | 0                  | 3,2085500008     | 186,0318473354 |
| 0              | 0                          | 0            | 1              | 1           | 0              | 1                | 0                  | 3,2848293071     | 181,6273457444 |
| 1              | 0                          | 0            | 1              | 1           | 0              | 1                | 0                  | 3,2747987759     | 183,1168510907 |
| 0              | 1                          | 0            | 1              | 1           | 0              | 1                | 0                  | 3,1973584813     | 181,4046701219 |
| 1              | 1                          | 0            | 1              | 1           | 0              | 1                | 0                  | 3,2679550592     | 182,5653056268 |
| 0              | 0                          | 1            | 1              | 1           | 0              | 1                | 0                  | 3,1484693947     | 180,1712905097 |
| 1              | 0                          | 1            | 1              | 1           | 0              | 1                | 0                  | 2,9568307002     | 178,6361103687 |
| 0              | 1                          | 1            | 1              | 1           | 0              | 1                | 0                  | 3,1580500977     | 181,6313092027 |
| 1              | 1                          | 1            | 1              | 1           | 0              | 1                | 0                  | 3,0413136272     | 180,2144847958 |
| 0              | 0                          | 0            | 0              | 0           | 1              | 1                | 0                  | 3,5380187231     | 187,9349478078 |

| Fertility Rate | Female labor participation | Unemployment | LGB acceptance | Religiosity | GDP per capita | Gini coefficient | Health expenditure | RMSE in test set | BIC            |
|----------------|----------------------------|--------------|----------------|-------------|----------------|------------------|--------------------|------------------|----------------|
| 1              | 0                          | 0            | 0              | 0           | 1              | 1                | 0                  | 3,6009316269     | 190,1272195983 |
| 0              | 1                          | 0            | 0              | 0           | 1              | 1                | 0                  | 3,5468465825     | 190,126009439  |
| 1              | 1                          | 0            | 0              | 0           | 1              | 1                | 0                  | 3,5694653481     | 191,3547786651 |
| 0              | 0                          | 1            | 0              | 0           | 1              | 1                | 0                  | 3,3461655968     | 185,1291187026 |
| 1              | 0                          | 1            | 0              | 0           | 1              | 1                | 0                  | 3,1620364779     | 183,3870937501 |
| 0              | 1                          | 1            | 0              | 0           | 1              | 1                | 0                  | 3,4309939702     | 188,5223425782 |
| 1              | 1                          | 1            | 0              | 0           | 1              | 1                | 0                  | 3,244818925      | 186,3445288024 |
| 0              | 0                          | 0            | 1              | 0           | 1              | 1                | 0                  | 3,5705843425     | 186,7979958879 |
| 1              | 0                          | 0            | 1              | 0           | 1              | 1                | 0                  | 3,7054699301     | 189,9216758067 |
| 0              | 1                          | 0            | 1              | 0           | 1              | 1                | 0                  | 3,2358027573     | 182,9232481117 |
| 1              | 1                          | 0            | 1              | 0           | 1              | 1                | 0                  | 3,4207803455     | 185,2412307379 |
| 0              | 0                          | 1            | 1              | 0           | 1              | 1                | 0                  | 3,3054010197     | 182,9689229429 |
| 1              | 0                          | 1            | 1              | 0           | 1              | 1                | 0                  | 3,1970794559     | 183,2744342515 |
| 0              | 1                          | 1            | 1              | 0           | 1              | 1                | 0                  | 3,1996363265     | 182,6786750417 |
| 1              | 1                          | 1            | 1              | 0           | 1              | 1                | 0                  | 3,1682477981     | 182,5789621863 |
| 0              | 0                          | 0            | 0              | 1           | 1              | 1                | 0                  | 3,5453829128     | 189,4907385088 |
| 1              | 0                          | 0            | 0              | 1           | 1              | 1                | 0                  | 3,4927331074     | 190,0076195282 |
| 0              | 1                          | 0            | 0              | 1           | 1              | 1                | 0                  | 3,5939043374     | 192,7994606872 |
| 1              | 1                          | 0            | 0              | 1           | 1              | 1                | 0                  | 3,5426597705     | 193,1144761423 |
| 0              | 0                          | 1            | 0              | 1           | 1              | 1                | 0                  | 3,4085520934     | 188,1888337615 |
| 1              | 0                          | 1            | 0              | 1           | 1              | 1                | 0                  | 3,1644335389     | 185,1599609856 |
| 0              | 1                          | 1            | 0              | 1           | 1              | 1                | 0                  | 3,484530153      | 191,714278502  |
| 1              | 1                          | 1            | 0              | 1           | 1              | 1                | 0                  | 3,2551725753     | 188,6660748267 |
| 0              | 0                          | 0            | 1              | 1           | 1              | 1                | 0                  | 3,3762180536     | 183,9695181269 |
| 1              | 0                          | 0            | 1              | 1           | 1              | 1                | 0                  | 3,3998000082     | 185,6155443984 |
| 0              | 1                          | 0            | 1              | 1           | 1              | 1                | 0                  | 3,2481406173     | 184,1146207925 |
| 1              | 1                          | 0            | 1              | 1           | 1              | 1                | 0                  | 3,3367293225     | 185,4260395857 |
| 0              | 0                          | 1            | 1              | 1           | 1              | 1                | 0                  | 3,235756354      | 183,1615512561 |
| 1              | 0                          | 1            | 1              | 1           | 1              | 1                | 0                  | 3,0690045111     | 181,9250030516 |
| 0              | 1                          | 1            | 1              | 1           | 1              | 1                | 0                  | 3,2109900442     | 184,7377828579 |
| 1              | 1                          | 1            | 1              | 1           | 1              | 1                | 0                  | 3,114100875      | 183,5738745601 |
| 0              | 0                          | 0            | 0              | 0           | 0              | 0                | 1                  | 3,6886852988     | 188,6108002996 |
| 1              | 0                          | 0            | 0              | 0           | 0              | 0                | 1                  | 3,6580786436     | 188,930392015  |
| 0              | 1                          | 0            | 0              | 0           | 0              | 0                | 1                  | 3,7035856823     | 190,3444541876 |

| Fertility Rate | Female labor participation | Unemployment | LGB acceptance | Religiosity | GDP per capita | Gini coefficient | Health expenditure | RMSE in test set | BIC            |
|----------------|----------------------------|--------------|----------------|-------------|----------------|------------------|--------------------|------------------|----------------|
| 1              | 1                          | 0            | 0              | 0           | 0              | 0                | 1                  | 3,6577645032     | 189,4241764207 |
| 0              | 0                          | 1            | 0              | 0           | 0              | 0                | 1                  | 3,4919675558     | 186,1699546337 |
| 1              | 0                          | 1            | 0              | 0           | 0              | 0                | 1                  | 3,195318303      | 181,4984638142 |
| 0              | 1                          | 1            | 0              | 0           | 0              | 0                | 1                  | 3,6000387994     | 189,3023179443 |
| 1              | 1                          | 1            | 0              | 0           | 0              | 0                | 1                  | 3,309322009      | 184,1144240566 |
| 0              | 0                          | 0            | 1              | 0           | 0              | 0                | 1                  | 3,6757550114     | 189,2071797342 |
| 1              | 0                          | 0            | 1              | 0           | 0              | 0                | 1                  | 3,6640395647     | 190,158740137  |
| 0              | 1                          | 0            | 1              | 0           | 0              | 0                | 1                  | 3,4417650394     | 186,7548960405 |
| 1              | 1                          | 0            | 1              | 0           | 0              | 0                | 1                  | 3,4358396983     | 186,0057187123 |
| 0              | 0                          | 1            | 1              | 0           | 0              | 0                | 1                  | 3,457454775      | 186,4409513864 |
| 1              | 0                          | 1            | 1              | 0           | 0              | 0                | 1                  | 3,1718501109     | 182,7066076676 |
| 0              | 1                          | 1            | 1              | 0           | 0              | 0                | 1                  | 3,4380565871     | 186,9683706621 |
| 1              | 1                          | 1            | 1              | 0           | 0              | 0                | 1                  | 3,1872987713     | 182,4624813982 |
| 0              | 0                          | 0            | 0              | 1           | 0              | 0                | 1                  | 3,645565258      | 187,0552989476 |
| 1              | 0                          | 0            | 0              | 1           | 0              | 0                | 1                  | 3,6181483853     | 186,6793029369 |
| 0              | 1                          | 0            | 0              | 1           | 0              | 0                | 1                  | 3,722229899      | 190,5604783183 |
| 1              | 1                          | 0            | 0              | 1           | 0              | 0                | 1                  | 3,6891542228     | 189,9151462358 |
| 0              | 0                          | 1            | 0              | 1           | 0              | 0                | 1                  | 3,5455681256     | 186,8063611566 |
| 1              | 0                          | 1            | 0              | 1           | 0              | 0                | 1                  | 3,2978995505     | 182,1699989399 |
| 0              | 1                          | 1            | 0              | 1           | 0              | 0                | 1                  | 3,637833577      | 190,2643614823 |
| 1              | 1                          | 1            | 0              | 1           | 0              | 0                | 1                  | 3,3977141548     | 185,6826968626 |
| 0              | 0                          | 0            | 1              | 1           | 0              | 0                | 1                  | 3,0822557789     | 178,314556663  |
| 1              | 0                          | 0            | 1              | 1           | 0              | 0                | 1                  | 3,0892371933     | 178,8744319847 |
| 0              | 1                          | 0            | 1              | 1           | 0              | 0                | 1                  | 3,1195972188     | 180,6135397785 |
| 1              | 1                          | 0            | 1              | 1           | 0              | 0                | 1                  | 3,1189453568     | 180,2894153938 |
| 0              | 0                          | 1            | 1              | 1           | 0              | 0                | 1                  | 3,0734551672     | 179,3772157218 |
| 1              | 0                          | 1            | 1              | 1           | 0              | 0                | 1                  | 2,9141305906     | 176,6530156682 |
| 0              | 1                          | 1            | 1              | 1           | 0              | 0                | 1                  | 3,1534485372     | 182,3442674593 |
| 1              | 1                          | 1            | 1              | 1           | 0              | 0                | 1                  | 2,995396857      | 179,1391536932 |
| 0              | 0                          | 0            | 0              | 0           | 1              | 0                | 1                  | 3,7284916901     | 192,1123876573 |
| 1              | 0                          | 0            | 0              | 0           | 1              | 0                | 1                  | 3,7277813142     | 192,3970425106 |
| 0              | 1                          | 0            | 0              | 0           | 1              | 0                | 1                  | 3,7685509934     | 193,8515874572 |
| 1              | 1                          | 0            | 0              | 0           | 1              | 0                | 1                  | 3,7611904566     | 192,8941273462 |
| 0              | 0                          | 1            | 0              | 0           | 1              | 0                | 1                  | 3,5202514392     | 189,6332801534 |

| Fertility Rate | Female labor participation | Unemployment | LGB acceptance | Religiosity | GDP per capita | Gini coefficient | Health expenditure | RMSE in test set | BIC            |
|----------------|----------------------------|--------------|----------------|-------------|----------------|------------------|--------------------|------------------|----------------|
| 1              | 0                          | 1            | 0              | 0           | 1              | 0                | 1                  | 3,2560004084     | 184,8248407055 |
| 0              | 1                          | 1            | 0              | 0           | 1              | 0                | 1                  | 3,6450939949     | 192,7737357217 |
| 1              | 1                          | 1            | 0              | 0           | 1              | 0                | 1                  | 3,3943931954     | 187,4563874352 |
| 0              | 0                          | 0            | 1              | 0           | 1              | 0                | 1                  | 3,7881491719     | 192,732249912  |
| 1              | 0                          | 0            | 1              | 0           | 1              | 0                | 1                  | 3,7855065049     | 193,6687330362 |
| 0              | 1                          | 0            | 1              | 0           | 1              | 0                | 1                  | 3,4813161145     | 190,2718732905 |
| 1              | 1                          | 0            | 1              | 0           | 1              | 0                | 1                  | 3,4837654465     | 189,5320670966 |
| 0              | 0                          | 1            | 1              | 0           | 1              | 0                | 1                  | 3,5372347434     | 189,951375083  |
| 1              | 0                          | 1            | 1              | 0           | 1              | 0                | 1                  | 3,2568016048     | 186,1224895314 |
| 0              | 1                          | 1            | 1              | 0           | 1              | 0                | 1                  | 3,4809885881     | 190,4946959341 |
| 1              | 1                          | 1            | 1              | 0           | 1              | 0                | 1                  | 3,2387193689     | 185,9449843922 |
| 0              | 0                          | 0            | 0              | 1           | 1              | 0                | 1                  | 3,7767551663     | 190,2560270498 |
| 1              | 0                          | 0            | 0              | 1           | 1              | 0                | 1                  | 3,7657145069     | 189,7153490425 |
| 0              | 1                          | 0            | 0              | 1           | 1              | 0                | 1                  | 3,860660242      | 193,7774862423 |
| 1              | 1                          | 0            | 0              | 1           | 1              | 0                | 1                  | 3,8605342806     | 193,0336476082 |
| 0              | 0                          | 1            | 0              | 1           | 1              | 0                | 1                  | 3,6494212343     | 190,0202010365 |
| 1              | 0                          | 1            | 0              | 1           | 1              | 0                | 1                  | 3,417626576      | 185,119375095  |
| 0              | 1                          | 1            | 0              | 1           | 1              | 0                | 1                  | 3,7342501091     | 193,4308586184 |
| 1              | 1                          | 1            | 0              | 1           | 1              | 0                | 1                  | 3,5263100609     | 188,6453288396 |
| 0              | 0                          | 0            | 1              | 1           | 1              | 0                | 1                  | 3,0630295228     | 181,3599057252 |
| 1              | 0                          | 0            | 1              | 1           | 1              | 0                | 1                  | 3,0792371484     | 181,7470780451 |
| 0              | 1                          | 0            | 1              | 1           | 1              | 0                | 1                  | 3,1161084866     | 183,8302436486 |
| 1              | 1                          | 0            | 1              | 1           | 1              | 0                | 1                  | 3,1248369969     | 183,4029120748 |
| 0              | 0                          | 1            | 1              | 1           | 1              | 0                | 1                  | 3,0606946225     | 182,4380186022 |
| 1              | 0                          | 1            | 1              | 1           | 1              | 0                | 1                  | 2,9186121639     | 179,4414924135 |
| 0              | 1                          | 1            | 1              | 1           | 1              | 0                | 1                  | 3,1522814389     | 185,5222434371 |
| 1              | 1                          | 1            | 1              | 1           | 1              | 0                | 1                  | 3,0089092123     | 182,1184319148 |
| 0              | 0                          | 0            | 0              | 0           | 0              | 1                | 1                  | 3,6828254832     | 187,9353517375 |
| 1              | 0                          | 0            | 0              | 0           | 0              | 1                | 1                  | 3,7162107532     | 190,0663943141 |
| 0              | 1                          | 0            | 0              | 0           | 0              | 1                | 1                  | 3,7741499372     | 190,4329823965 |
| 1              | 1                          | 0            | 0              | 0           | 0              | 1                | 1                  | 3,7876635428     | 191,6356809928 |
| 0              | 0                          | 1            | 0              | 0           | 0              | 1                | 1                  | 3,5249957724     | 185,5743207607 |
| 1              | 0                          | 1            | 0              | 0           | 0              | 1                | 1                  | 3,3150432811     | 183,8220048261 |
| 0              | 1                          | 1            | 0              | 0           | 0              | 1                | 1                  | 3,650182668      | 189,0173192184 |

| Fertility Rate | Female labor participation | Unemployment | LGB acceptance | Religiosity | GDP per capita | Gini coefficient | Health expenditure | RMSE in test set | BIC            |
|----------------|----------------------------|--------------|----------------|-------------|----------------|------------------|--------------------|------------------|----------------|
| 1              | 1                          | 1            | 0              | 0           | 0              | 1                | 1                  | 3,449213633      | 186,8176978384 |
| 0              | 0                          | 0            | 1              | 0           | 0              | 1                | 1                  | 3,4208733479     | 183,9275616838 |
| 1              | 0                          | 0            | 1              | 0           | 0              | 1                | 1                  | 3,5875967081     | 187,2675945059 |
| 0              | 1                          | 0            | 1              | 0           | 0              | 1                | 1                  | 3,2225580063     | 180,8943280933 |
| 1              | 1                          | 0            | 1              | 0           | 0              | 1                | 1                  | 3,4305699321     | 183,5934649403 |
| 0              | 0                          | 1            | 1              | 0           | 0              | 1                | 1                  | 3,2596201885     | 180,9118019894 |
| 1              | 0                          | 1            | 1              | 0           | 0              | 1                | 1                  | 3,2010335793     | 181,9883542551 |
| 0              | 1                          | 1            | 1              | 0           | 0              | 1                | 1                  | 3,211021125      | 180,9928678309 |
| 1              | 1                          | 1            | 1              | 0           | 0              | 1                | 1                  | 3,220277092      | 181,6340525317 |
| 0              | 0                          | 0            | 0              | 1           | 0              | 1                | 1                  | 3,7945464904     | 189,7025305104 |
| 1              | 0                          | 0            | 0              | 1           | 0              | 1                | 1                  | 3,7302092972     | 190,2036466997 |
| 0              | 1                          | 0            | 0              | 1           | 0              | 1                | 1                  | 3,8596229545     | 193,1112487626 |
| 1              | 1                          | 0            | 0              | 1           | 0              | 1                | 1                  | 3,8040052425     | 193,4278592328 |
| 0              | 0                          | 1            | 0              | 1           | 0              | 1                | 1                  | 3,6489856203     | 188,6921666094 |
| 1              | 0                          | 1            | 0              | 1           | 0              | 1                | 1                  | 3,3924009648     | 185,6917589548 |
| 0              | 1                          | 1            | 0              | 1           | 0              | 1                | 1                  | 3,7313945897     | 192,2170536822 |
| 1              | 1                          | 1            | 0              | 1           | 0              | 1                | 1                  | 3,4917532334     | 189,2020059457 |
| 0              | 0                          | 0            | 1              | 1           | 0              | 1                | 1                  | 3,2313977169     | 179,8213900747 |
| 1              | 0                          | 0            | 1              | 1           | 0              | 1                | 1                  | 3,2872830055     | 181,9143679986 |
| 0              | 1                          | 0            | 1              | 1           | 0              | 1                | 1                  | 3,1995862359     | 181,0492916698 |
| 1              | 1                          | 0            | 1              | 1           | 0              | 1                | 1                  | 3,3031989526     | 182,8268363569 |
| 0              | 0                          | 1            | 1              | 1           | 0              | 1                | 1                  | 3,1716877006     | 180,0247953041 |
| 1              | 0                          | 1            | 1              | 1           | 0              | 1                | 1                  | 3,060617539      | 179,7459701333 |
| 0              | 1                          | 1            | 1              | 1           | 0              | 1                | 1                  | 3,1964648226     | 182,2125337774 |
| 1              | 1                          | 1            | 1              | 1           | 0              | 1                | 1                  | 3,1380439407     | 181,8921471336 |
| 0              | 0                          | 0            | 0              | 0           | 1              | 1                | 1                  | 3,7530372982     | 190,9351208871 |
| 1              | 0                          | 0            | 0              | 0           | 1              | 1                | 1                  | 3,7673145528     | 193,1351478018 |
| 0              | 1                          | 0            | 0              | 0           | 1              | 1                | 1                  | 3,9438693544     | 193,5161099579 |
| 1              | 1                          | 0            | 0              | 0           | 1              | 1                | 1                  | 3,934890596      | 194,8330763278 |
| 0              | 0                          | 1            | 0              | 0           | 1              | 1                | 1                  | 3,6048737973     | 188,4280474617 |
| 1              | 0                          | 1            | 0              | 0           | 1              | 1                | 1                  | 3,3625393782     | 186,7731422138 |
| 0              | 1                          | 1            | 0              | 0           | 1              | 1                | 1                  | 3,772211759      | 191,9025460596 |
| 1              | 1                          | 1            | 0              | 0           | 1              | 1                | 1                  | 3,5462392041     | 189,8517998286 |
| 0              | 0                          | 0            | 1              | 0           | 1              | 1                | 1                  | 3,3794642268     | 186,7561355212 |

| Fertility Rate | Female labor participation | Unemployment | LGB acceptance | Religiosity | GDP per capita | Gini coefficient | Health expenditure | RMSE in test set | BIC            |
|----------------|----------------------------|--------------|----------------|-------------|----------------|------------------|--------------------|------------------|----------------|
| 1              | 0                          | 0            | 1              | 0           | 1              | 1                | 1                  | 3,5527679633     | 190,1330320611 |
| 0              | 1                          | 0            | 1              | 0           | 1              | 1                | 1                  | 3,2460227439     | 183,8970098931 |
| 1              | 1                          | 0            | 1              | 0           | 1              | 1                | 1                  | 3,4469655927     | 186,6739457081 |
| 0              | 0                          | 1            | 1              | 0           | 1              | 1                | 1                  | 3,2219926792     | 183,5364003007 |
| 1              | 0                          | 1            | 1              | 0           | 1              | 1                | 1                  | 3,1777488975     | 184,7236105976 |
| 0              | 1                          | 1            | 1              | 0           | 1              | 1                | 1                  | 3,2261968171     | 183,8112065896 |
| 1              | 1                          | 1            | 1              | 0           | 1              | 1                | 1                  | 3,2258065865     | 184,5665085985 |
| 0              | 0                          | 0            | 0              | 1           | 1              | 1                | 1                  | 3,9453819788     | 192,6273172108 |
| 1              | 0                          | 0            | 0              | 1           | 1              | 1                | 1                  | 3,871406606      | 193,2077785177 |
| 0              | 1                          | 0            | 0              | 1           | 1              | 1                | 1                  | 4,0402642655     | 196,0810779578 |
| 1              | 1                          | 0            | 0              | 1           | 1              | 1                | 1                  | 3,9764161008     | 196,5042734531 |
| 0              | 0                          | 1            | 0              | 1           | 1              | 1                | 1                  | 3,7762186684     | 191,5157589707 |
| 1              | 0                          | 1            | 0              | 1           | 1              | 1                | 1                  | 3,5037564536     | 188,5975049319 |
| 0              | 1                          | 1            | 0              | 1           | 1              | 1                | 1                  | 3,8639032009     | 195,0263304932 |
| 1              | 1                          | 1            | 0              | 1           | 1              | 1                | 1                  | 3,6165892749     | 192,1218754428 |
| 0              | 0                          | 0            | 1              | 1           | 1              | 1                | 1                  | 3,1886985666     | 182,3147099799 |
| 1              | 0                          | 0            | 1              | 1           | 1              | 1                | 1                  | 3,2596022998     | 184,4960367548 |
| 0              | 1                          | 0            | 1              | 1           | 1              | 1                | 1                  | 3,2004792681     | 183,7643359733 |
| 1              | 1                          | 0            | 1              | 1           | 1              | 1                | 1                  | 3,3017840063     | 185,6410846827 |
| 0              | 0                          | 1            | 1              | 1           | 1              | 1                | 1                  | 3,1355600764     | 182,4072897239 |
| 1              | 0                          | 1            | 1              | 1           | 1              | 1                | 1                  | 3,0478418771     | 182,2403640175 |
| 0              | 1                          | 1            | 1              | 1           | 1              | 1                | 1                  | 3,1946470362     | 184,7897776476 |
| 1              | 1                          | 1            | 1              | 1           | 1              | 1                | 1                  | 3,1381813669     | 184,572995699  |
