# Supplementary material for: Acceptance Towards LGB Persons Is an Independent Protective Factor Against Suicide on a Country Level
Source: Springer Nature journal article supplement (doi:10.1007/s13178-020-00477-3), 2020-07-16
Supplement: MOESM2 [file 18191302]

| Country         | Fertility_Rate | Female_Labor | Unemployment | LGB_inclusive<br>ness | Suicides_age_<br>standardized | Religiosity | GDP_capita | Gini  | Health_expend<br>iture |
|-----------------|----------------|--------------|--------------|-----------------------|-------------------------------|-------------|------------|-------|------------------------|
| Australia       | 1.83           | 59.69        | 5.51         | 6.30                  | 11.70                         | 32          | 48,899     | 34.70 | 4.71                   |
| Austria         | 1.53           | 54.87        | 5.44         | 5.30                  | 11.40                         | 55          | 48,005     | 30.50 | 5.23                   |
| Belgium         | 1.72           | 47.89        | 7.07         | 5.80                  | 15.70                         | 33          | 45,047     | 28.10 | 4.84                   |
| Canada          | 1.53           | 61.02        | 6.17         | 5.70                  | 10.40                         | 42          | 46,437     | 34.00 | 4.75                   |
| Chile           | 1.65           | 50.91        | 6.51         | 5.10                  | 9.70                          | 70          | 24,113     | 47.70 | 1.98                   |
| Czech Republic  | 1.64           | 52.54        | 2.73         | 5.00                  | 10.50                         | 21          | 33,232     | 25.90 | 2.54                   |
| Denmark         | 1.76           | 58.10        | 5.86         | 7.30                  | 9.20                          | 19          | 47,985     | 28.50 | 5.21                   |
| Estonia         | 1.59           | 57.14        | 5.38         | 2.80                  | 14.40                         | 16          | 29,313     | 34.60 | 1.99                   |
| Finland         | 1.53           | 55.16        | 8.63         | 6.30                  | 13.80                         | 28          | 42,165     | 26.80 | 4.03                   |
| France          | 1.85           | 50.44        | 9.58         | 6.10                  | 12.10                         | 30          | 42,314     | 32.30 | 4.60                   |
| Germany         | 1.59           | 55.21        | 3.70         | 6.00                  | 9.10                          | 40          | 48,111     | 31.40 | 5.55                   |
| Greece          | 1.30           | 45.45        | 21.05        | 3.90                  | 3.80                          | 71          | 26,669     | 35.80 | 2.22                   |
| Hungary         | 1.49           | 48.27        | 4.08         | 3.70                  | 13.60                         | 39          | 27,482     | 30.90 | 2.10                   |
| Ireland         | 1.84           | 55.36        | 6.59         | 5.20                  | 10.90                         | 54          | 69,231     | 31.90 | 5.53                   |
| Israel          | 3.04           | 59.21        | 4.09         | 4.90                  | 5.20                          | 51          | 35,179     | 41.40 | 2.82                   |
| Italy           | 1.33           | 40.10        | 11.50        | 3.30                  | 5.50                          | 72          | 36,833     | 34.70 | 3.39                   |
| Japan           | 1.37           | 51.41        | 2.77         | 4.80                  | 14.30                         | 24          | 41,275     | 32.10 | 4.52                   |
| Latvia          | 1.72           | 55.57        | 8.59         | 2.40                  | 17.20                         | 39          | 25,710     | 35.10 | 1.47                   |
| Luxembourg      | 1.45           | 53.48        | 5.45         | 6.30                  | 10.40                         | 39          | 104,003    | 31.20 | 7.46                   |
| Mexico          | 2.14           | 43.66        | 3.36         | 4.70                  | 5.20                          | 73          | 18,938     | 43.40 | 1.08                   |
| New Zealand     | 1.90           | 64.64        | 4.70         | 5.70                  | 11.60                         | 33          | 37,294     | 36.20 | 3.59                   |
| Norway          | 1.68           | 60.29        | 4.06         | 7.40                  | 10.10                         | 21          | 69,249     | 26.80 | 6.65                   |
| Poland          | 1.42           | 49.15        | 4.70         | 3.20                  | 13.40                         | 75          | 27,764     | 32.10 | 1.80                   |
| Portugal        | 1.29           | 54.17        | 8.65         | 4.30                  | 8.60                          | 72          | 28,933     | 35.60 | 2.73                   |
| Slovak Republic | 1.50           | 52.83        | 7.91         | 5.10                  | 10.10                         | 47          | 31,339     | 26.10 | 2.15                   |
| Slovenia        | 1.60           | 53.75        | 6.46         | 4.90                  | 13.30                         | 47          | 32,085     | 25.70 | 2.84                   |
| South Korea     | 1.11           | 52.74        | 3.60         | 2.80                  | 20.20                         | 43          | 37,740     | 31.60 | 2.73                   |
| Spain           | 1.33           | 51.86        | 16.89        | 6.60                  | 6.10                          | 49          | 36,416     | 36.00 | 3.25                   |
| Sweden          | 1.85           | 60.97        | 6.70         | 8.10                  | 11.70                         | 17          | 49,836     | 27.20 | 5.49                   |
| Switzerland     | 1.54           | 62.60        | 4.96         | 6.80                  | 11.30                         | 41          | 59,561     | 32.50 | 7.92                   |
| Turkey          | 2.08           | 33.57        | 10.59        | 1.60                  | 7.20                          | 82          | 24,912     | 41.90 | 1.09                   |
| United Kingdom  | 1.75           | 57.04        | 4.23         | 5.20                  | 7.60                          | 27          | 42,481     | 34.10 | 4.19                   |
| United States   | 1.78           | 56.31        | 4.30         | 5.00                  | 13.70                         | 69          | 57,436     | 41.50 | 9.89                   |

|             |      |       |      |      |      |    |        |       |      |
|-------------|------|-------|------|------|------|----|--------|-------|------|
| Netherlands | 1.66 | 58.08 | 4.69 | 7.60 | 9.60 | 33 | 51,049 | 28.60 | 5.39 |
|-------------|------|-------|------|------|------|----|--------|-------|------|

Fertility\_Rate: average number of children per woman, World Bank 2017

Female\_Labor: female labor force participation in percent, modeled estimate of the International Labour Organization provided by the World Bank 2017

Unemployment: unemployment rate in percent, OECD labour market statistics quarter 3 of 2017

LGB\_inclusiveness: country-specific average response to the question "Please tell me whether you think homosexuality can always be justified, never be justified, or something in between" (on a scale from 1 - 10)

Suicides\_age\_standardized: Suicides per 100.000 people, corrected for age structure as published by the WHO 2016

Religiosity: country-specific percentage of "yes" responses on the question "Is religion important in your daily life?", which is part of the global Gallup Poll 2009

GDP\_capita: Gross domestic product based on purchasing-power-parity per capita (in U.S. dollars, international monetary fund 2016)

Gini: income inequality (gini coefficient, newest available world bank estimate for each country)

Health\_expenditure: Health expenditure per capita (in thousand international U.S. Dollars, purchasing power parity corrected, OECD 2017)
